# Supplementary material for: Simulating magnetic nanotubes using a chain of ellipsoid-rings model with a magnetization reversal process by fanning rotation
Source: Royal Society of Chemistry journal article supplement (doi:10.1039/c5cp00181a), 2015-01-01
Supplement: c5cp00181a1.pdf [file c5cp00181a1.pdf]

## Supplementary information

### 1. Detailed deduction of exchange energy $E_{ex}$

The exchange energy  $E_{ex}$  is denoted as the summation of magnetostatic energy between all magnetic moments. In the model of chain of ellipsoid-rings, we only consider the dominant energy of magnetic interactions, namely, magnetic interaction energy within each ring  $E_{ex(rings)}$  and within each chain  $E_{ex(chains)}$  of ellipsoids. Thus, the exchange energy  $E_{ex}$  can be described as

$$E_{ex} = E_{ex(rings)} + E_{ex(chains)}. \quad (S1)$$

In the following, we shall deduce the mathematical form of the exchange energy  $E_{ex}$  in detail.

The exchange energy  $E_{ex}$  stems from the magnetic interaction between magnetic moments. The energy between two magnetic moments is

$$E_{ij} = \frac{1}{r_{ij}^3} [(\boldsymbol{\mu}_i \boldsymbol{\mu}_j) - \frac{3}{r_{ij}^2} (\boldsymbol{\mu}_i \mathbf{r}_{ij})(\boldsymbol{\mu}_j \mathbf{r}_{ij})], \quad (S2)$$

where  $\boldsymbol{\mu}_i$  and  $\boldsymbol{\mu}_j$  are two dipoles of magnetic moments and  $\mathbf{r}_{ij}$  is vector between  $\boldsymbol{\mu}_i$  and  $\boldsymbol{\mu}_j$ . Thus, both  $E_{ex(rings)}$  and  $E_{ex(chains)}$  can be deduced from the Eq.(S2).

First, starting from the Eq.(S2), the magnetic interaction energy within each ring  $E_{ex(rings)}$  can be calculated as follows:

$$\begin{aligned} E_{ex(rings)} &= \frac{N_r}{2} \sum_{j=0}^{N_e-1} \sum_{i=1}^{N_e-1} E_{ij} \\ &= \frac{N_r}{2} \sum_{j=0}^{N_e-1} \sum_{i=1}^{N_e-1} \frac{1}{r_{ij}^3} [(\boldsymbol{\mu}_i \boldsymbol{\mu}_j) - \frac{3}{r_{ij}^2} (\boldsymbol{\mu}_i \mathbf{r}_{ij})(\boldsymbol{\mu}_j \mathbf{r}_{ij})], \quad (S3) \\ &= \frac{N_r}{2} \sum_{j=0}^{N_e-1} \sum_{i=1}^{N_e-1} \frac{1}{r_{ij}^3} [\mu_e^2 - \frac{3}{r_{ij}^2} (\boldsymbol{\mu}_e \mathbf{r}_{ij})^2] \end{aligned}$$

where each ellipsoid is treated as a dipole of magnetic moment  $\boldsymbol{\mu}_e$  and the  $N_r$  and  $N_e$  represent the number of rings in a nanotube and number of ellipsoids in a ring, respectively. As shown in the Eq.(S3), there are two items of  $\mathbf{r}_{ij}$  and  $\boldsymbol{\mu}_e \mathbf{r}_{ij}$  to be solved before the final mathematical form of  $E_{ex(rings)}$  is obtained. To solve  $\mathbf{r}_{ij}$  and  $\boldsymbol{\mu}_e \mathbf{r}_{ij}$ , we

schematically illustrate the relation between the  $\mu_{e(i)}$  and  $\mu_{e(j)}$  in a ring in the Fig. S1 according to the coordinate described in Fig. 1(c).

(1) Calculation of  $r_{ij}$  item. As shown in Fig. S1, the azimuthal angle of  $\mu_{e(i)}$  and  $\mu_{e(j)}$  in ring plane are  $\varphi_i$  and  $\varphi_j$ , and there are  $i-1$  ellipsoids between  $\mu_{e(i)}$  and  $\mu_{e(j)}$ . Thus, the distance  $r_{ij}$  between  $\mu_{e(i)}$  and  $\mu_{e(j)}$  can be calculated as

$$r_{ij} = 2(R - r_e)^2 - 2(R - r_e)^2 \cos(\varphi_i - \varphi_j) = \{2(R - r_e)^2 [1 - \cos(2\pi i / N_e)]\}^{\frac{1}{2}} \quad (S4)$$

(2) Calculation of  $\mu_e r_{ij}$  item. According to the mathematical definition,  $\mu_e r_{ij} = \mu_e r_{ij} \cos(\langle \mu_e, r_{ij} \rangle)$ . As shown in Fig. S1, the projection of all magnetic moments in the ring plane (the dotted arrows in the Fig. S1) is parallel to the X-Z plane (the dotted line in the Fig. S1); thus, the angle between projection of  $\mu_{e(i)}$  and

$r_{ij}$  becomes  $\frac{\pi}{2} + \left(\frac{\varphi_i + \varphi_j}{2}\right) = \frac{\pi}{2} + \varphi_j + \frac{\pi}{N_e i}$ . At the same time, the external field  $H$

respectively makes the angles  $(\alpha + \theta_0)/(-\alpha + \theta_0)$  and  $\theta_0$  with respect to the magnetic moment  $\mu_e$  and tube axis direction according to the coordinate described in Fig.1(c), and we correspondingly show the relation among  $(\alpha + \theta_0)/(-\alpha + \theta_0)$ ,  $\theta_0$  and  $H$  in the Figure S2. Thus, the angle between the magnetic moment  $\mu_e$  and

the ring plane becomes  $\frac{\pi}{2} - \alpha$  and the cosine of the angle of  $\mu_{e(i)}$  to  $r_{ij}$  is calculated

$$\text{as } \cos(\langle \mu_e, r_{ij} \rangle) = \cos\left[\frac{\pi}{2} - \alpha\right] \cos\left[\frac{\pi}{2} + \varphi_j + \frac{\pi}{N_e i}\right] = -\sin \alpha \sin\left(\varphi_j + \frac{\pi}{N_e i}\right)$$

Therefore, the  $\mu_e r_{ij}$  can be written as:

$$\mu_e r_{ij} = \mu_e r_{ij} \cos(\langle \mu_e, r_{ij} \rangle) = -\mu_e r_{ij} \sin \alpha \sin\left(\varphi_j + \frac{\pi}{N_e i}\right) \quad (S5)$$

Substituting Eq.(S4) and Eq.(S5) for Eq.(S3), the magnetic interaction energy within each ring  $E_{ex(rings)}$  can be written as

$$\begin{aligned}
E_{ex(\text{rings})} &= \frac{N_r}{2} \sum_{j=0}^{N_e-1} \sum_{i=1}^{N_e-1} \frac{1}{r_{ij}^3} \left[ \mu_e^2 - \frac{3}{r_{ij}^2} (\boldsymbol{\mu}_e \mathbf{r}_{ij})^2 \right] \\
&= \frac{N_r \mu_e^2}{2} \sum_{j=0}^{N_e-1} \sum_{i=1}^{N_e-1} \frac{1 - 3 \left(1 - \cos^2 \alpha\right) \sin^2 \left(\varphi_j + \frac{\pi i}{N_e}\right)}{\{2(R - r_e)^2 [1 - \cos(2\pi i / N_e)]\}^{3/2}}. \tag{S6}
\end{aligned}$$

Second, the magnetic interaction energy within a chain  $E_{ex(\text{chains})}$  can also be calculated from the Eq.(S2). Considering the exchange energy  $E_{ex(\text{chain})}$  in a single chain, it is denoted as the sum of all exchange energy between the magnetic moments in a chain, namely, from the nearest-neighbor exchange energy to the furthest-neighbor exchange energy. Here we set the number of rings is even. Thus, the total energy in a single chain can be calculated as:

$$\begin{aligned}
E_{ex(\text{chain})} &= \sum E_{ex(\text{nearest})} + \sum E_{ex(\text{next-nearest})} + \dots E_{ex(\text{furthest})} \\
&= \sum_{\text{nearest}} \frac{1}{r_{ij}^3} \left[ \mu_e^2 - \frac{3}{r_{ij}^2} (\boldsymbol{\mu}_e \mathbf{r}_{ij})^2 \right] + \sum_{\text{next-nearest}} \frac{1}{r_{ij}^3} \left[ \mu_e^2 - \frac{3}{r_{ij}^2} (\boldsymbol{\mu}_e \mathbf{r}_{ij})^2 \right] + \dots \frac{1}{r_{ij}^3} \left[ \mu_e^2 - \frac{3}{r_{ij}^2} (\boldsymbol{\mu}_e \mathbf{r}_{ij})^2 \right] \\
&= \frac{(N_r - 1) \mu_e^2}{(1 \times 2kr_e)^3} (\cos 2\alpha - 3 \cos^2 \alpha) + \frac{(N_r - 2) \mu_e^2}{(2 \times 2kr_e)^3} (1 - 3 \cos^2 \alpha) \\
&\quad + \dots \frac{\mu_e^2}{[(N_r - 1) \times 2kr_e]^3} (\cos 2\alpha - 3 \cos^2 \alpha) \\
&= \frac{N_r K_{N_r} \mu_e^2}{(2kr_e)^3} \left[ L_{N_r} (\cos 2\alpha - 3 \cos^2 \alpha) + M_{N_r} (1 - 3 \cos^2 \alpha) \right], \tag{S7}
\end{aligned}$$

where

$$\begin{aligned}
L_{N_r} &= \sum_{i=1}^{\frac{1}{2}(N_r-1) < i \leq \frac{1}{2}(N_r+1)} \frac{N_r - (2i - 1)}{N_r (2i - 1)^3}, \\
M_{N_r} &= \sum_{i=1}^{\frac{1}{2}(N_r-2) < i \leq \frac{1}{2}N_r} \frac{N_r - 2i}{N_r (2i)^3}, \\
K_{N_r} &= M_{N_r} + L_{N_r} = \sum_{i=1}^{N_r} \frac{N_r - i}{N_r i^3}
\end{aligned}$$

Finally, by substituting Eq.(S6) and Eq.(S7) into Eq.(S1), the total exchange energy  $E_{ex}$  can be described in the following mathematical form:

$$E_{ex} = \frac{N_r \mu_e^2}{2} \sum_{j=0}^{N_e-1} \sum_{i=1}^{N_e-1} \frac{1 - 3(1 - \cos^2 \alpha) \sin^2 \left( \phi_j + \frac{\pi i}{N_e} \right)}{\left\{ 2(R - r_e)^2 \left[ 1 - \cos \left( \frac{2\pi i}{N_e} \right) \right] \right\}^{3/2}} \quad (S8)$$

$$+ \frac{N_r N_e K_{N_r} \mu_e^2}{(2kr_e)^3} \begin{bmatrix} L_{N_r} (\cos 2\alpha - 3 \cos^2 \alpha) \\ + M_{N_r} (1 - 3 \cos^2 \alpha) \end{bmatrix}$$

Figure. S1

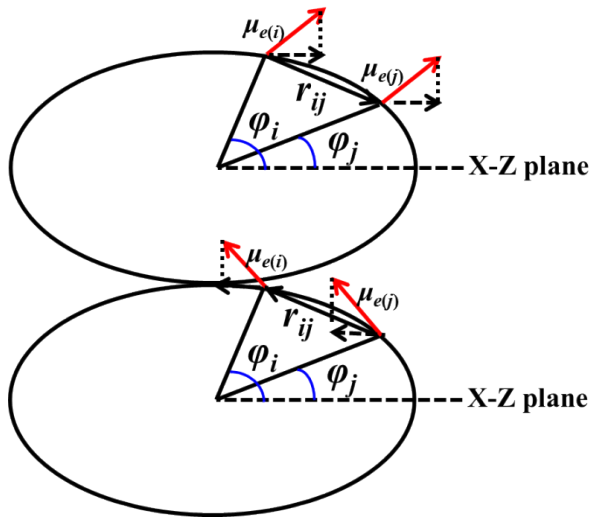

FIG. S1 Schematic diagram of geometric relation between  $\mu_{e(i)}$  and  $\mu_{e(j)}$ .

Figure. S2

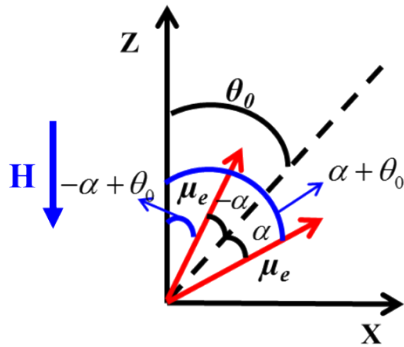

FIG. S2 Angles between magnetic moment  $\mu_e$ , axis direction of nanotube, and external field  $H$ .



## 2. Detailed calculation of coercivity in the fanning rotation and coherent rotation

According to the Eq. (11) in our previous work (see the ref. [24] of this article) and the Eq. (9) in this article, we can easily obtain the coercivity  $H_c$  of coherent rotation and fanning rotation. The equations are as follows:

For the coherent rotation,

$$H_c = \begin{cases} -\frac{2a}{b} (\cos^{\frac{2}{3}}\theta_0 + \sin^{\frac{2}{3}}\theta_0)^{-\frac{3}{2}}, & 0^\circ < \theta_0 \leq 45^\circ \\ -\frac{a \sin 2\theta_0}{b}, & 45^\circ < \theta_0 \leq 90^\circ \end{cases}, \quad (S9)$$

where

$$a = \frac{N_r \mu_e^2}{2} \sum_{j=0}^{N_e-1} \sum_{i=1}^{N_e-1} \frac{3 \sin^2 \left( \varphi_j + \frac{\pi i}{N_e} \right)}{\{2(R-r_e)^2 [1 - \cos(2\pi i / N_e)]\}^{3/2}} - 3 \frac{N_r N_e K_{N_r} \mu_e^2}{(2kr_e)^3} - \frac{1}{2} N_r N_e I_s \mu_e (N_t - N_o)$$

$$b = N_r N_e \mu_e$$

For the fanning rotation,

$$H_c = \begin{cases} -\frac{2d}{e} (\cos^{\frac{2}{3}}\theta_0 + \sin^{\frac{2}{3}}\theta_0)^{-\frac{3}{2}}, & (0^\circ < \theta_0 \leq 45^\circ) \\ -\frac{d}{e} \sin 2\theta_0, & (45^\circ < \theta_0 \leq 90^\circ) \end{cases}, \quad (S10)$$

where,

$$d = \frac{N_r \mu_e^2}{2} \sum_{j=0}^{N_e-1} \sum_{i=1}^{N_e-1} \frac{3 \sin^2 \left( \varphi_j + \frac{\pi i}{N_e} \right)}{\{2(R-r_e)^2 [1 - \cos(2\pi i / N_e)]\}^{3/2}} - \frac{N_r N_e K_{N_r} \mu_e^2 L_{N_r}}{(2kr_e)^3} - \frac{3 N_r N_e K_{N_r} \mu_e^2 M_{N_r}}{(2kr_e)^3} + \frac{1}{2} N_r N_e I_s \mu_e (N_t - N_o)$$

$$e = \frac{N_r}{2} N_e \mu_e$$

It is clearly seen that there are four coefficients of  $a$ ,  $b$ ,  $d$  and  $e$  in the Eq. (S9) and Eq. (S10); all these coefficients are function of the geometric parameters of nanotubes, including axis ratio  $k$ , the length of nanotube  $N_r$ , the number of ellipsoid in a rings  $N_e$  and the thickness of nanotube,  $2r_e$ . To simply calculate the coercivity, we set  $N_e$  is equal to 50 and then study the influence of the geometric parameters of nanotube on the magnetic properties, especially for the coercivity  $H_c$ . All the calculation results are demonstrated in the Fig. 3, Fig. 4 and Fig.5. In addition, in order to compare the coercivity of fanning rotation with that of coherent rotation, we set the same values of  $k$ ,  $N_r$ , and  $2r_e$  to calculate magnetic properties, as shown in the Fig. 5.
